# Supplementary material for: Thermosensitive PLGA–PEG–PLGA Hydrogel as Depot Matrix for Allergen-Specific Immunotherapy
Source: MDPI journal article supplement (doi:10.3390/pharmaceutics14081527), 2022-07-22
Supplement: s1 [file s1]

## Supplemental Figures

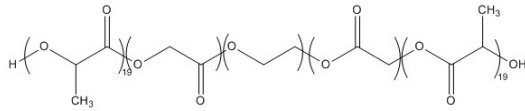

**Figure S1.** Structure of hydrogel: A triblock copolymer, consisting of A-blocks (polyethyleneglycol (PEG)) and B-blocks (poly(lactide-co-glycolide) (PLGA)) arranged in a B-A-B type.

## Supplemental Materials

**Table S1.** Antibodies for FACS analysis of BALF cells.

| Marker                            | Fluorochrome | Clone    | Manufacturer   |
|-----------------------------------|--------------|----------|----------------|
| CD4                               | AF700        | RM4-5    | BioLegend      |
| CD8                               | FITC         | 53-6.7   | BD Biosciences |
| CD11b                             | BV711        | M1/70    | BioLegend      |
| CD11c                             | PE-Cy7       | N418     | Biolegend      |
| CD45                              | PerCP-Cy5.5  | 30-F11   | BioLegend      |
| CD206                             | PE-Dazzle594 | C068C2   | BioLegend      |
| F4/80                             | APC-eF780    | BM8      | eBiosciences   |
| NK1.1                             | APC          | PK136    | eBiosciences   |
| Ly-6G                             | PacificBlue  | 1A8      | Biolegend      |
| Siglec-F                          | PE           | E50-2440 | BD Biosciences |
| Live/dead aqua fixable cell stain | 405nm        | —        | ThermoFisher   |

**Table S2.** Antibodies for FACS analysis of lung lymphocytes.

| Marker                            | Fluorochrome | Clone    | Manufacturer   |
|-----------------------------------|--------------|----------|----------------|
| CD3ε                              | FITC         | 145-2C11 | BD Biosciences |
| CD4                               | AF700        | RM4-5    | BioLegend      |
| CD45                              | APC-eF780    | 30-F11   | eBiosciences   |
| FoxP3                             | PerCP-Cy5.5  | FJK-16s  | eBiosciences   |
| GATA3                             | eF660        | TWAJ     | eBiosciences   |
| Live/dead aqua fixable cell stain | 405nm        | —        | ThermoFisher   |
